# Supplementary material
Source: PubMed Central journal article supplement (PMC2993202)
Supplement: datasupp.pdf [file datasupp.pdf]

1 **Supplemental Methods**

2 *T cell isolation and staining:* Negative immunofluorescence controls were performed on  
3 cells that do not express BK channels. Whole blood was fixed in 16% formaldehyde and  
4 centrifuged. The supernatant was removed and the sample was re-suspended in 50%  
5 MeOH in PBS. Small aliquots of the sample were then dried to slides, permeabilized, and  
6 blocked in donkey serum. Samples were then treated with anti-CD3 (1:100); a T-cell  
7 marker, BK $\alpha$  (1:100) or BK $\beta$ 1 (1:100). Primary antibodies were detected with  
8 fluorescently labeled secondary antibodies and nuclei were labeled with Hoechst 33342.  
9 All images were collected on confocal microscope on a 63x oil immersion objective.

10 *Electron microscopy of rat aortic endothelial cells:* To validate that the methyl- $\beta$ -  
11 cyclodextrin (MBCD) concentration (100  $\mu$ M) chosen to mildly deplete membrane  
12 cholesterol did not drastically impact caveolar structure, electron microscopic images  
13 were obtained in control tissue and tissue subjected to cholesterol chelation. Aortic  
14 sections were fixed for 2 hours at room temperature in 2% formaldehyde + 3%  
15 glutaraldehyde in 0.1 M Na cacodylate, pH 7.4. Tissues were washed in 0.1 M cacodylate  
16 and treated for 1 hour at room temperature in 1% osmium-potassium ferrocyanide in 0.1  
17 M cacodylate, followed by washes in 0.1M cacodylate and then in Barnstead H<sub>2</sub>O.  
18 Tissues were then treated *en bloc* with 1% uranyl acetate (aq), for 1 hour at room  
19 temperature and washed with Barnstead H<sub>2</sub>O, dehydrated through a graded series of  
20 ethanol to 100%, infiltrated and embedded in Epon-Araldite resin (cured at 65°C).  
21 Sections were cut to 70-90 nm thick, mounted on Cu grids, stained with uranyl acetate  
22 and lead citrate, and examined on a Hitachi H7500 TEM at 80kV. Digital images were  
23 taken on a CCD camera (AMT XR60).

24 *Effect of Nitric Oxide on BK<sub>Ca</sub> Channel Activity in Isolated Endothelial Cells.* As further  
25 confirmation of the activity of endothelial BK channels following CH, whole cell patch  
26 clamp experiments were performed in the presence and absence of a donor of nitric oxide  
27 (NO), a known activator of the channel (1). After cell dialysis, recordings were taken  
28 before and after 5 min of superfusion with the NO donor S-nitroso-N-acetyl-D,L-  
29 penicillamine (SNAP) (100  $\mu$ M) in aortic endothelial cells from control and CH rats.

### 30 **Supplemental Results**

31 *Validation of Specificity of BK Channel Immunofluorescence.* Additional experiments  
32 validated the specificity of immunofluorescence for BK $\alpha$  and BK $\beta$ 1. Supplemental  
33 Figure 1a shows the lack of staining in the presence of only the secondary (no primary)  
34 antibody in gracilis arterioles. Furthermore, blocking peptides for each primary antibody  
35 prevented staining (Supplemental Figure 1 b,c). In addition, the endothelial cell  
36 localization of BK $\alpha$  was confirmed in sections of gracilis arterioles stained for both BK $\alpha$   
37 and the endothelial cell specific marker PECAM-1 (Supplemental Figure 2) as described  
38 in the Methods section of the paper. As a final determination of specificity of the BK $\alpha$   
39 and BK $\beta$ 1 primary antibodies, we examined staining in isolated rat T-cells that do not  
40 express the channel. Supplemental Figure 3 shows the lack of BK $\alpha$  or BK $\beta$ 1  
41 immunofluorescence in these cells, whereas they stain positive for the T-cell marker  
42 CD3. The same secondary antibody was used for all images.

43 *Lack of Effect of MBCD on Gross Structure of Caveolae.* A dose of MBCD (100  $\mu$ M)  
44 was chosen that unmasked endothelial BK channels activity in control cells, but was  
45 much lower than the 10 mM concentration used by others in vascular preparations (2; 3).

46 **Following administration of this lower dose of MBCD, no apparent differences were**

47 detectable in caveolae number or structure from untreated controls. CH treatment  
48 additionally did not result in an apparent reduction in caveolae number or structure  
49 (Supplemental Figure 4). However, 10 mM MBCD eliminated EC caveolae  
50 (Supplemental Figure 4).

51 *Effect of Nitric Oxide on BK<sub>Ca</sub> Channel Activity in Isolated Endothelial Cells.*

52 Administration of the NO donor SNAP elicited a further increase in outward current in  
53 aortic endothelial cells from CH but not control rats (Supplemental Figure 5). NO has  
54 been identified as an activator of BK channels (1) and thus this observation confirms their  
55 presence in endothelial cells from CH rats. Our other data showing that MBCD treatment  
56 unmask channel activity in cells from control animals suggests that the channels are  
57 normally inhibited by likely association with caveolin-1 (4) that is inhibition is removed  
58 following CH, thus permitting activation by NO.

59

60

61

62

63

64

65

66

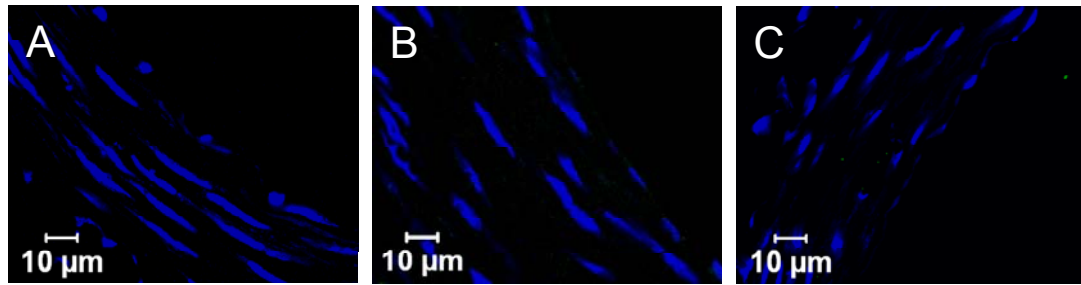

67

68 **Supplemental Figure 1.** Gracilis arteriole cross sections were treated with secondary  
69 antibodies and no primary antibodies to confirm lack of staining in the absence of  
70 primary antibody. (panel A). Additional cross sections were treated with BK $\alpha$  (panel B)  
71 or BK $\beta$ 1 (panel C) primary antibodies plus respective blocking peptides to confirm  
72 primary antibody specificity.

73

74

75

76

77

78

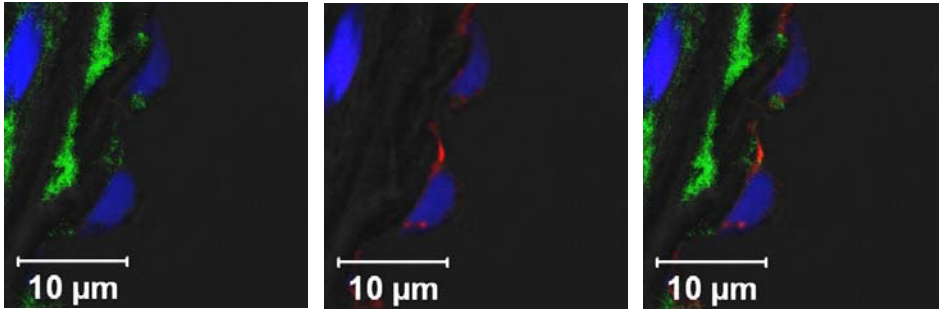

79

80

81

82

83

84

85

**Supplemental Figure 2.** BK $\alpha$  and PECAM-1 primary antibodies demonstrated endothelium specific staining. Cross sections were stained for BK $\alpha$  (green) and the endothelial marker PECAM-1 (1:100) (red). PECAM-1 staining appeared only in endothelial cells (middle and right panels), while BK $\alpha$  staining appeared in vascular smooth muscle cells and endothelial cells in the cross sections (left and right panels). Nuclei are blue.

86

87

88

89

90

91

92

93

94

95

96

97

98

99 **Supplemental Figure 3.** Isolated leukocytes (T cells) from control rats were treated with  
100 primary antibodies to BK $\alpha$  as a negative control, since these cells do not express BK  
101 channels. Slides were stained for BK $\alpha$  (middle panel) or BK $\beta$ 1 1:100 (right panel), the T-  
102 cell marker CD3 (red), and a nuclear stain (blue). No BK $\alpha$  or BK $\beta$ 1 staining appeared in  
103 leukocytes, in contrast to positive staining in vascular smooth muscle cells and  
104 endothelial cells in figure 8 and supplemental figure 2. Scale bar = 10  $\mu$ m.  
105

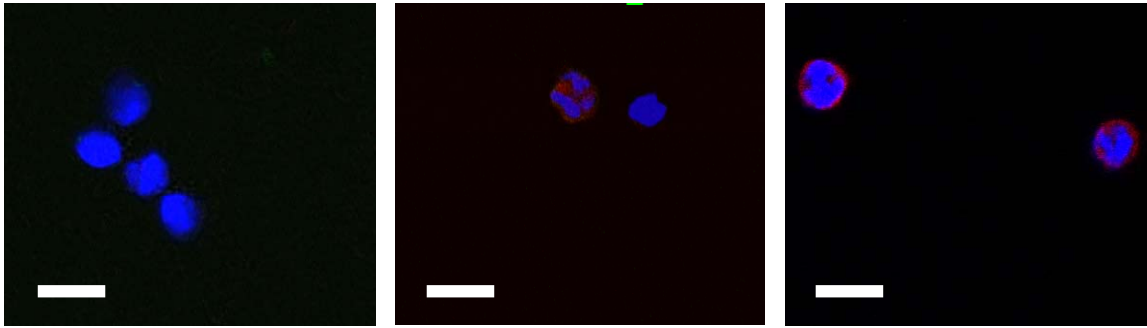

106

107

108

109

110

111

112

113

114

115

116

117

118

119

120

121

122

123

124

125

126

127

128

129

130

131

132

133

134

135

136

137

138

139

140

141

142

143

144

145

146

147

148

149

150

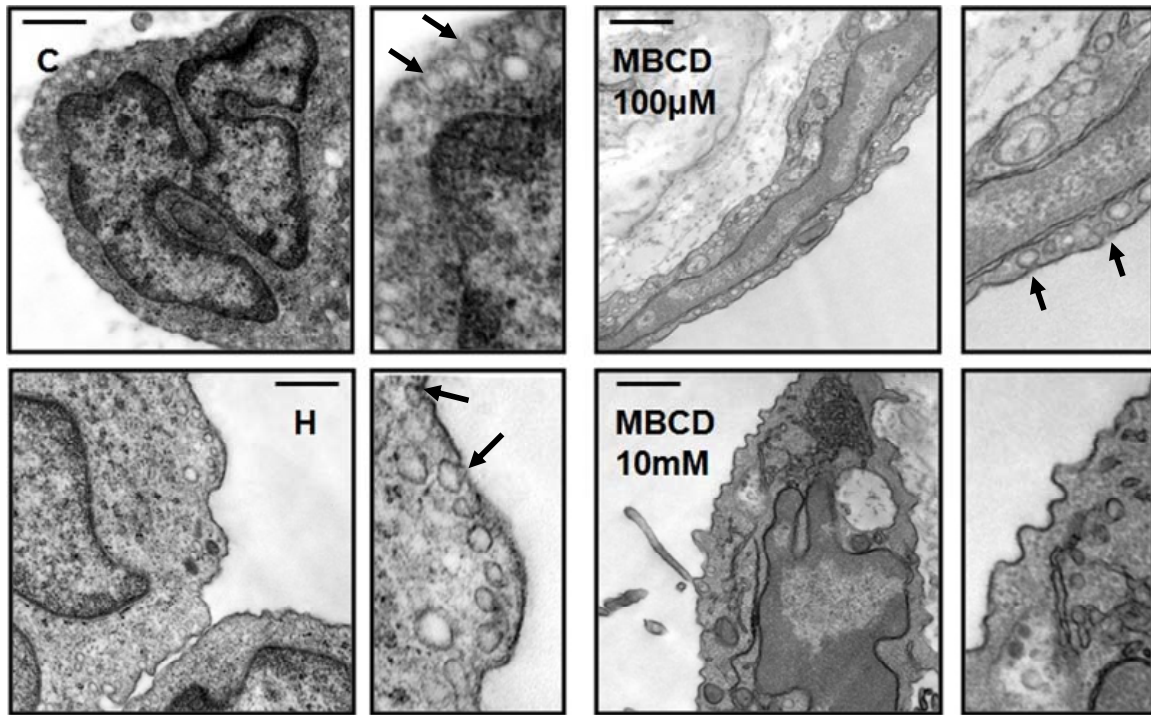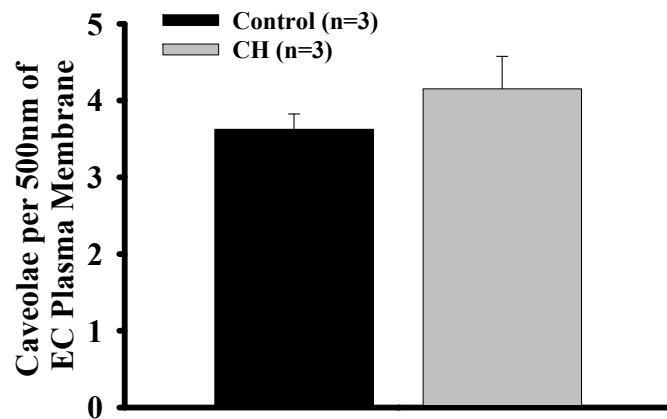

**Supplemental Figure 4.** Electron microscopy images of endothelial cells from control (labeled C in top left) gracilis arterioles treated with vehicle, 100  $\mu$ M or 10mM methyl  $\beta$ -cyclodextrin (MBCD) or arteries from CH rats (labeled H in lower left panels). Enlargements illustrating membrane structure are shown for each condition and caveolae are indicated by arrows. Treatment with MBCD did not eliminate caveolar structures at the 100  $\mu$ M concentration (top right, arrows), however the 10 mM MBCD concentration eliminated caveolae (bottom right). CH treatment did not alter caveolar presence or apparent structure compared to normoxic controls (bottom panel). The 100  $\mu$ M MBCD treatment elicited increased outward  $K^+$  currents from control ECs (Fig. 11a of the main paper) with no significant effect on outward currents in ECs from CH animals (Fig. 11b). Interestingly, putative reduction in cellular cholesterol by MBCD treatment without

151 ablation of caveolae enabled EC BK<sub>Ca</sub> channel activity in controls to a level similar to  
152 that found in CH animals (Figure 12a: iberiotoxin sensitive currents) Scale bar = 500 nM,  
153 images at 15000x. The bar graph shows that the number of membrane caveolae counted  
154 in images of gracilis arterioles did not differ between control and CH groups.  
155



156

157

158

159

160

161

162

163

164

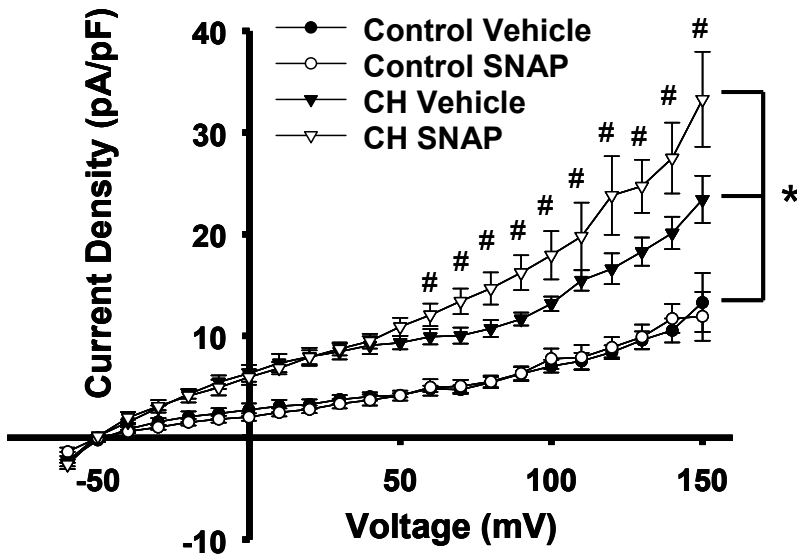

165

166

167

168

169

170

171

172

173

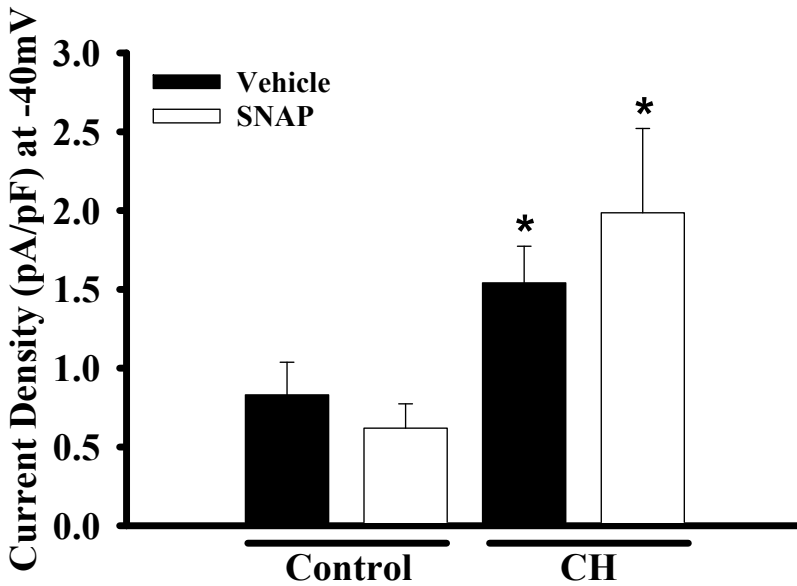

174

175

176

177

178

179

180

181

182

**Supplemental Figure 5.** Exogenous nitric oxide (NO) increased outward  $K^+$  currents in ECs from CH animals (n=6 cells) but had no effect on currents in controls (n=4 cells) (top panel). Current density at -40mV was significantly larger from ECs from CH animals (bottom panel) and exogenous NO from the NO donor S-nitroso-N-acetyl-D,L-penicillamine (SNAP) 100 $\mu$ M increased outward current only in ECs from CH animals. \* $p$ <0.05 CH vs. control vehicle, # $p$ <0.05 CH SNAP vs. CH vehicle (+70mV through +150mV).

183  
184  
185

References

- 186 1. **Bolotina VM, Najibi S, Palacino JJ, Pagano PJ and Cohen RA.** Nitric oxide  
187 directly activates calcium-dependent potassium channels in vascular smooth  
188 muscle. *Nature* 368: 850-853, 1994.
- 189 2. **Linder AE, McCluskey LP, Cole KR, III, Lanning KM and Webb RC.**  
190 Dynamic association of nitric oxide downstream signaling molecules with  
191 endothelial caveolin-1 in rat aorta. *J Pharmacol Exp Ther* 314: 9-15, 2005.
- 192 3. **Linder AE, Thakali KM, Thompson JM, Watts SW, Webb RC and Leite R.**  
193 Methyl-beta-cyclodextrin prevents angiotensin II-induced tachyphylactic contractile  
194 responses in rat aorta. *J Pharmacol Exp Ther* 323: 78-84, 2007.
- 195 4. **Wang XL, Ye D, Peterson TE, Cao S, Shah VH, Katusic ZS, Sieck GC and Lee**  
196 **HC.** Caveolae targeting and regulation of large conductance Ca(2+)-activated K<sup>+</sup>  
197 channels in vascular endothelial cells. *J Biol Chem* 280: 11656-11664, 2005.

198  
199
